# Supplementary material
Source: MDPI journal article supplement (https://www.mdpi.com/2073-445X/11/2/223)
Supplement: s1 [file s1 › land-1535327-supplementary.pdf]

*Supplementary material of*

# **Opportunities for mitigating soil compaction in Europe – Case studies from the SoilCare project using soil improving cropping systems**

**Ilaria Piccoli <sup>1</sup>, Till Seehusen <sup>2\*</sup>, Jenny Bussell <sup>3</sup>, Olga Vizitu <sup>4</sup>, Irina Calciu <sup>4</sup>, Antonio Berti <sup>1</sup>, Gunnar Börjesson <sup>5</sup>, Holger Kirchmann <sup>5</sup>, Thomas Kätterer <sup>6</sup>, Felice Sartori <sup>1</sup>, Chris Stoate <sup>3</sup>, Felicity Crotty <sup>7</sup>, Ioanna S. Panagea <sup>8</sup>, Abdallah Alaoui <sup>9</sup> and Martin A. Bolinder <sup>6</sup>**

<sup>1</sup> Department of Agronomy, Food, Natural Resources, Animals and Environment, University of Padova, viale dell'Università 16, 35020 Legnaro, Italy; ilaria.piccoli@unipd.it (I.P.); antonio.berti@unipd.it (A.B.); felice.sartori@phd.unipd.it (F.S.)

<sup>2</sup> Norwegian Institute of Bioeconomy Research, PO Box 115, Ås NO-1431, Norway; till.seehusen@nibio.no (T.S.)

<sup>3</sup> The Game & Wildlife Conservation Trust, Allerton Project, Loddington, Leicestershire, LE7 9XE, United Kingdom; jbusell@gwct.org.uk (J.B.); cstoa@gwct.org.uk (C.S.)

<sup>4</sup> National Research and Development Institute for Soil Science, Agrochemistry and Environmental Protection, 011464 Bucharest, Romania; olga\_gate@yahoo.com (O.V.); calciuirina.icpa@gmail.com (I.C.)

<sup>5</sup> Department of Soil and Environment, Swedish University of Agricultural Sciences, PO Box 7014, 75007 Uppsala, Sweden; gunnar.borjesson@slu.se (G.B.); holger.kirchmann@slu.se (H.K.)

<sup>6</sup> Department of Ecology, Swedish University of Agricultural Sciences, PO Box 7044, Uppsala, 75007, Sweden; thomas.katterer@slu.se (T.K.); martin.bolinder@slu.se (M.A.B.)

<sup>7</sup> Royal Agricultural University, Stroud Rd, Cirencester GL7 6JS, United Kingdom; felicity.crotty@rau.ac.uk (F.C.)

<sup>8</sup> Department of Earth and Environmental Science, KU Leuven, Celestijnenlaan 200e -box 2411, 3001 Leuven, Belgium; panagea.ioanna@gmail.com (I.S.P.)

<sup>9</sup> Institute of Geography, University of Bern, Hallerstrasse 12, 3012 Bern, Switzerland; abdallah.alaoui@giub.unibe.ch (A.A.)

\* Correspondence: till.seehusen@nibio.no; Tel.: (+47) 93269878 (T.S.)

**Table S1.** Study site, climate and soil information for each country involved in the present study.

|            |                                                                    | Norway                  | Sweden                  | The U.K.                   | Italy                   | Romania                             |
|------------|--------------------------------------------------------------------|-------------------------|-------------------------|----------------------------|-------------------------|-------------------------------------|
| Study site | Location                                                           | Solør, near Kongsvinger | Orup, Skåne county      | Loddington, Leicestershire | Legnaro                 | Drăgănești-Vlașca, Teleorman county |
|            | Institution                                                        | NIBIO                   | SLU                     | GWCT                       | UNIPD                   | ICPA                                |
| Climate    | Latitude (DD), longitude (DD) and altitude (m a.s.l.)              | 60.25, 12.08, 172       | 55.49, 13.3, 75         | 52.36, 0.5, 186            | 45.2, 11.57, 7          | 44.07, 25.56, 26                    |
|            | Starting year                                                      | 2017                    | 2018                    | 2017                       | 2018                    | 2018                                |
|            | Climate (Köppen-Geiger)                                            | Dfc                     | Cfc                     | Cfc                        | Cfb                     | Cfb                                 |
|            | Average annual precipitation (mm)                                  | 656                     | 666                     | 707                        | 834                     | 543                                 |
|            | Average annual temperature (C)                                     | 3.85                    | 8.1                     | 9.15                       | 11.7                    | 11.3                                |
| Soil       | WRB Reference Groups                                               | Stagnosol               | Phaeozem                | Stagnosol                  | Cambisol                | Chernozem                           |
|            | Soil texture class (USDA)                                          | Silty <sup>a</sup>      | Sandy loam <sup>a</sup> | Clay <sup>b</sup>          | Silty loam <sup>b</sup> | Clay loam <sup>a</sup>              |
|            | SOC (g 100 g <sup>-1</sup> )                                       | 0.74 <sup>c</sup>       | 2.11 <sup>d</sup>       | 2.88 <sup>d</sup>          | 0.76 <sup>d</sup>       | 2.23 <sup>e</sup>                   |
|            | Total N (g 100 g <sup>-1</sup> )                                   | na                      | 0.20 <sup>d</sup>       | na                         | 0.099 <sup>d</sup>      | na                                  |
|            | pH                                                                 | 4.95 <sup>f</sup>       | 6.90 <sup>g</sup>       | 6.64 <sup>f</sup>          | 7.36 <sup>f</sup>       | 6.20 <sup>g</sup>                   |
|            | Plant available K <sup>+</sup> (mg kg <sup>-1</sup> ) <sup>h</sup> | na                      | 74                      | 125                        | 94                      | 13                                  |
|            | Plant available P (mg kg <sup>-1</sup> ) <sup>h</sup>              | na                      | 100                     | 41.8                       | 35.6                    | 44.7                                |

na: not available; <sup>a</sup>pipette method, <sup>b</sup>laser diffraction method, <sup>c</sup>ignition loss, <sup>d</sup>dry combustion, <sup>e</sup>Walkley-Black method; <sup>f</sup>in KCl, <sup>g</sup>in water, <sup>h</sup>plant-available K and P were obtained accordingly with standard ISO methods.

**Table S2.** Depth of topsoil and subsoil sampling for chemical-physical analysis at each study site.

| Study site   | Topsoil sampling layer<br>(cm) | Subsoil sampling layer<br>(cm) |
|--------------|--------------------------------|--------------------------------|
| Norway-NIBIO | 10-20                          | 30-40                          |
| Sweden-SLU   | 10-15                          | 28-33                          |
| U.K.-GWCT    | 0-10                           | 30-40                          |
| Italy-UNIPD  | 0-20                           | 40-60                          |
| Romania-ICPA | 10-20                          | 40-50                          |

**Table S3.** Topsoil (10-20 cm) bulk density (BD), total pore volume (TPV), air capacity (AC), saturated hydraulic conductivity (Ks) and air permeability (Air perm) in the un-compacted reference plots at the Norwegian study site in 2015 and in treatment 3 (barley monoculture) and treatment 4 (alfalfa monoculture) plots in 2020.

|                       | BD<br>(g cm <sup>-3</sup> ) | TPV<br>(%)    | AC<br>(%)        | Ks<br>(m day <sup>-1</sup> )                          | Air perm<br>(um <sup>2</sup> ) |
|-----------------------|-----------------------------|---------------|------------------|-------------------------------------------------------|--------------------------------|
| <b>2015</b>           |                             |               |                  |                                                       |                                |
| <u>Reference plot</u> | 1.34 ± 0.08                 | 49.1 ± 2.8    | 8.02 ± 2.94      | 11.43 ± 4.05                                          | 419.0 ± 326.5                  |
| <b>2020</b>           |                             |               |                  |                                                       |                                |
| <u>Reference plot</u> |                             |               |                  |                                                       |                                |
| Treatment 3*          | 1.30 ± 0.09 ns              | 49.4 ± 2.6 ns | 17.50 ± 31.19 ns | 2.38 ± 3.09 ns ¶                                      | 12.6 ± 15.6 ns ¶               |
| Treatment 4           | 1.40 ± 0.14 ns              | 44.3 ± 8.6 ns | 6.80 ± 2.77 ns   | 1.0 × 10 <sup>-2</sup> ± 1.29 × 10 <sup>-2</sup> ns ¶ | 0.2 ± 0.2 ns ¶                 |

Mean ± standard deviation (2015 n = 5, 2020 n = 4). For 2020, ¶ indicates a significant difference between 2020 and the value in 2015 for each treatment. ns= not significant at p<0.05.

\*Except for treatment 4 with alfalfa, all plots with annual crops (treatments 1-3) were ploughed to 25 cm depth every year. Consequently, in 2020, only barley monoculture plots (treatment 3) were subject to topsoil sampling for comparison with the alfalfa plots, assuming no differences in topsoil physical properties would have occurred between the treatments with annual crops.

**Table S4.** Results from soil profile descriptions in 2019, maximum penetrometer depth and analysis of undisturbed soil cylinders from two depths in 2020, for all three treatments at the Swedish study site.

| Measurement                                            | Control | Subsoiling | Subsoiling + straw |
|--------------------------------------------------------|---------|------------|--------------------|
| <b>Soil profile description</b>                        |         |            |                    |
| Number of roots at three depths <sup>x</sup>           |         |            |                    |
| 10 cm                                                  | 31      | 32         | 63                 |
| 20 cm                                                  | 22      | 54         | 64                 |
| 30 cm                                                  | 3       | 19         | 16                 |
| Maximum penetration into the subsoil (cm) <sup>y</sup> | 4 ± 1.2 | 10.9 ± 3.0 | 11.1 ± 2.6         |
| <b>Soil cylinders</b>                                  |         |            |                    |
| BD (g cm <sup>-3</sup> )                               |         |            |                    |
| 10-15 cm depth                                         | 1.39ab  | 1.47b      | 1.36ac             |
| 28-33 cm depth                                         | 1.51a   | 1.58b      | 1.55ab             |
| BD_fine soil (g cm <sup>-3</sup> )                     |         |            |                    |
| 10-15 cm depth                                         | 1.35a   | 1.42a      | 1.32a              |
| 28-33 cm depth                                         | 1.46a   | 1.54a      | 1.49a              |
| Gravel and stones (weight %)                           |         |            |                    |
| 10-15 cm depth                                         | 6.7a    | 6.5a       | 6.1a               |
| 28-33 cm depth                                         | 6.3a    | 6.4a       | 8.3a               |
| C (%)                                                  |         |            |                    |
| 10-15 cm depth                                         | 2.10a   | 2.01b      | 2.09a              |
| 28-33 cm depth                                         | 1.81a   | 1.70a      | 1.64a              |
| C/N                                                    |         |            |                    |
| 10-15 cm depth                                         | 10.3a   | 10.4a      | 10.4a              |
| 28-33 cm depth                                         | 10.3a   | 10.3a      | 10.5a              |
| pH                                                     |         |            |                    |
| 10-15 cm depth                                         | 5.9a    | 5.9a       | 5.8a               |
| 28-33 cm depth                                         | 6.1a    | 6.1a       | 6.1a               |

<sup>x</sup>In one plot per treatment the number of roots was counted along a 10 cm line in the control, subsoiling and subsoiling + straw rows. <sup>y</sup>Means and standard deviations of maximum penetration into the subsoil (>24 cm) from six penetrometer measurements made in all plots for each treatment. BD = dry soil bulk density. BD\_fine soil = dry soil bulk density of the fine soil fraction corrected for mass and volume of gravel and stones, where the volume was calculated using a measured mean rock density of 2.6 g cm<sup>-3</sup>. For the 10-15 cm depth, BD, BD\_fine soil, gravel and stones, C, C/N and pH were from measurements in all cylinders. For the 28-33 cm depth, C, C/N and pH were from measurements on pooled soil samples from the six cylinders taken in each plot. Values with different letters within each row for the 10-15 and 28-33 cm depths are significantly different.

**Table S5.** Comparison of significance level among the linear mixed-effect models analysis of bulk density (BD), penetration resistance (PR), volumetric water content (VWC), soil organic carbon concentration (SOC), maize yield and soil hydraulic parameters (S, A and Ks) at the Italian study site. Significant effect ( $p < 0.05$ ) are highlighted in bold.

|                | Effect          | BD          | PR              | VWC         | SOC         | Yield       | S           | A    | K <sub>s</sub> |
|----------------|-----------------|-------------|-----------------|-------------|-------------|-------------|-------------|------|----------------|
| <b>Topsoil</b> | Intercept       | <b>0.01</b> | <b>0.08</b>     | <b>0.03</b> | <b>0.03</b> | <b>0.01</b> | 0.16        | 0.19 | 0.19           |
|                | Soil cover (SC) | 0.96        | <b>0.02</b>     | 0.34        | 0.72        | 0.47        | 0.17        | 0.48 | 0.48           |
|                | Tillage (T)     | 0.14        | <b>&lt;0.01</b> | 0.43        | 0.56        | 0.98        | <b>0.05</b> | 0.16 | 0.16           |
|                | S × T           | 0.47        | 0.54            | 0.28        | 0.95        | 0.79        | 0.12        | 0.35 | 0.35           |
| <b>Subsoil</b> | Intercept       | <b>0.01</b> | <b>0.03</b>     | <b>0.02</b> | <b>0.04</b> |             |             |      |                |
|                | Soil cover (SC) | 0.14        | 0.12            | 0.21        | 0.63        |             |             |      |                |
|                | Tillage (T)     | 0.55        | 0.92            | 0.91        | 0.60        |             |             |      |                |
|                | S × T           | 0.21        | 0.16            | 0.62        | 0.85        |             |             |      |                |

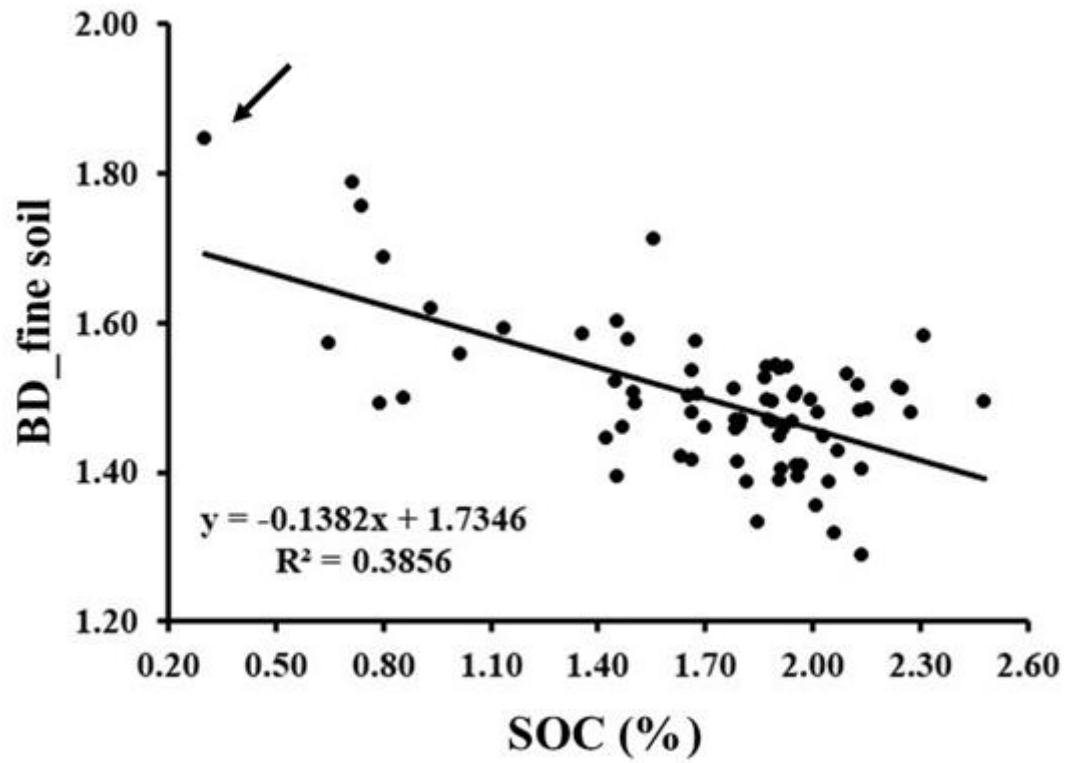

**Figure S1.** Relationship between soil organic carbon (SOC) content and dry soil bulk density of the fine soil fraction (BD\_fine soil) measured with all soil cylinders taken from 28-33 cm depth at the Swedish study site in 2020 (N = 72). The relationship excluding the point with the lowest SOC content (indicated with the arrow) was  $BD\_fine\ soil = -0.1199 \times 1.7007$  ( $R^2 = 0.3118$ ).

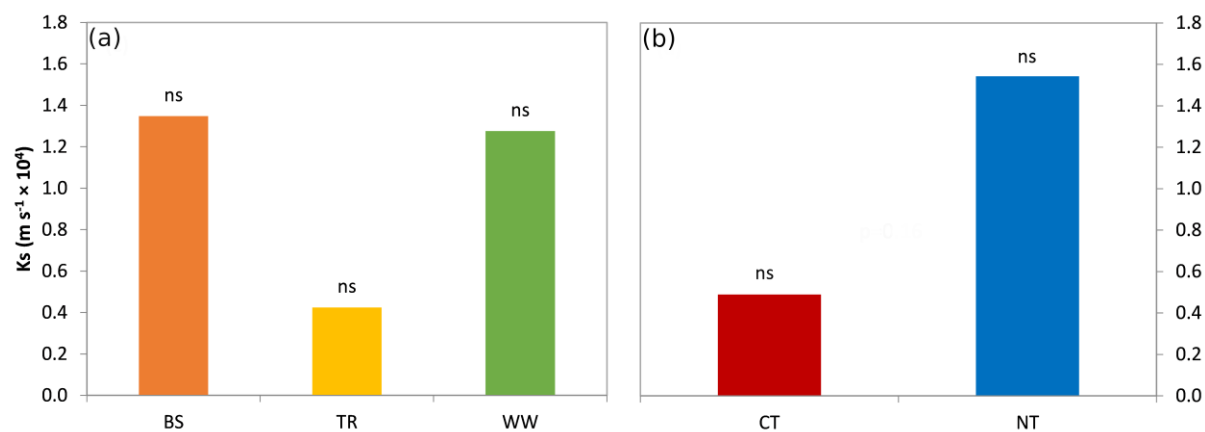

**Figure S2.** Topsoil (0-20 cm) saturated hydraulic conductivity (Ks) as affected by soil cover (a) and tillage (b) at the Italian study site. ns=not significant at  $p < 0.05$ . BS: bare soil; TR: tillage radish; WW: winter wheat; CT: conventional tillage; NT: no-tillage.

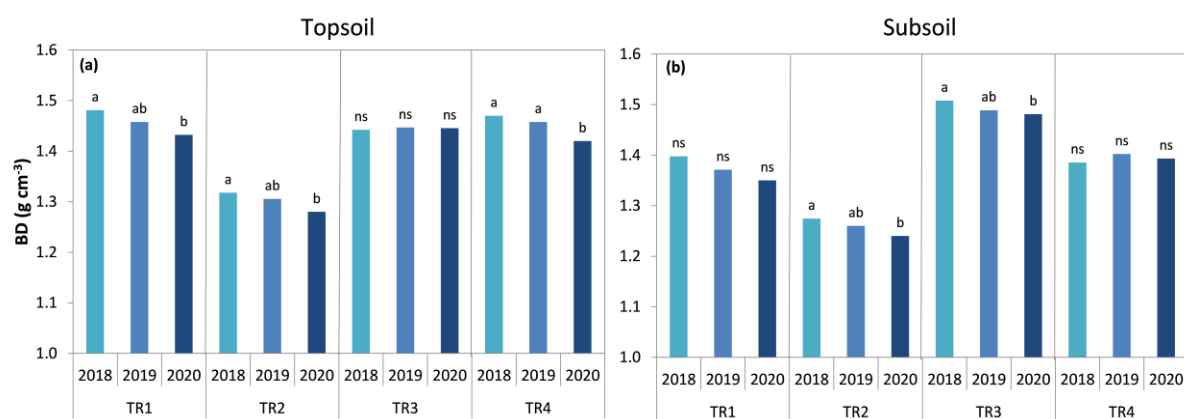

**Figure S3.** Topsoil (10-20 cm) (a) and subsoil (40-50 cm) (b) bulk density (BD) as affected by different years during three years of the experiment at the Romanian study site. Different letters represent significant differences according to Tukey post-hoc test at  $p < 0.05$ . ns=not significant at  $p < 0.05$ . TR1: mouldboard ploughing with furrow inversion to 25 cm depth; TR2: subsoiling to 60 cm + disking to 12 cm depth; TR3: control treatment with 2-times disking; TR4: chiselling to 25 cm depth with furrow inversion.

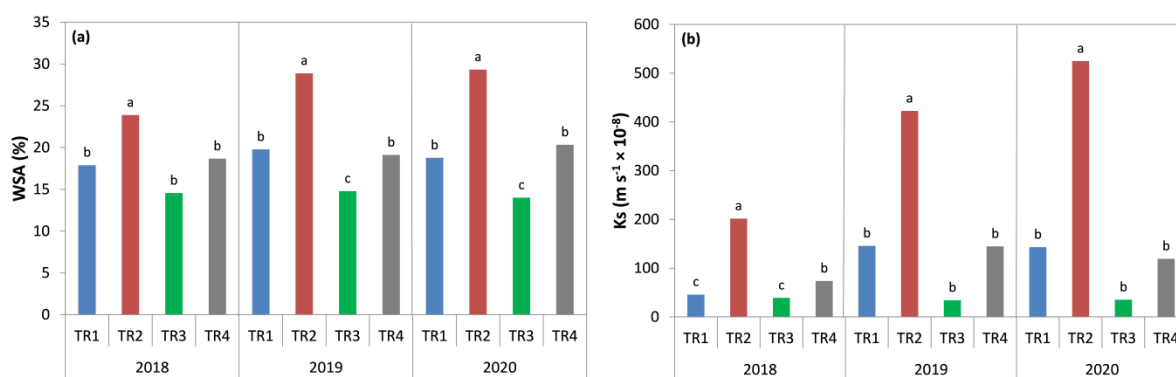

**Figure S4.** Content of water-stable aggregates (WSA) (a) and saturated hydraulic conductivity (Ks) (b) in the topsoil (10-20 cm) layer as affected by different tillage systems during three years of the Romanian experiment. Different letters represent significant differences according to Tukey post-hoc test at  $p < 0.05$ . TR1: mouldboard ploughing with furrow inversion to 25 cm depth; TR2: subsoiling to 60 cm + disking to 12 cm depth; TR3: control treatment with 2-times disking; TR4: chiseling to 25 cm depth with furrow inversion.

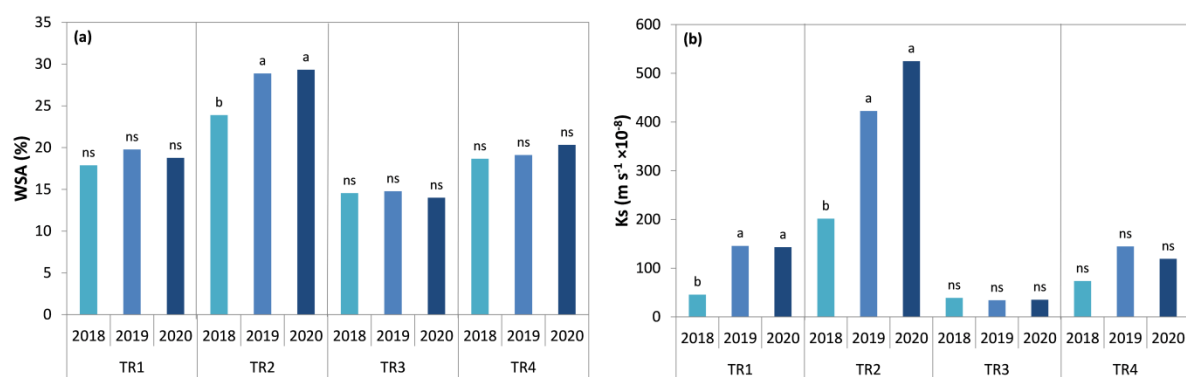

**Figure S5.** Content of water-stable aggregates (WSA) (a) and saturated hydraulic conductivity (Ks) (b) in the topsoil layer as affected by different years during three years of the experiment at the Romanian study site. Different letters represent significant differences according to Tukey post-hoc test at  $p < 0.05$ . ns=not significant at  $p < 0.05$ . TR1: mouldboard ploughing with furrow inversion to 25 cm depth; TR2: subsoiling to 60 cm + disking to 12 cm depth; TR3: control treatment with 2-times disking; TR4: chiselling to 25 cm depth with furrow inversion.
